# The influence of sex steroid treatment on insular connectivity in gender dysphoria

**Running title: Insular connectivity in gender dysphoria**

Murray B Reed<sup>#1</sup>, Patricia A Handschuh<sup>#1</sup>, Manfred Klöbl<sup>1</sup>, Melisande E Konadu<sup>1</sup>, Ulrike Kaufmann<sup>2</sup>,  
Andreas Hahn<sup>1</sup>, Georg S Kranz<sup>1,3</sup>, Marie Spies<sup>1</sup>, Rupert Lanzenberger<sup>1\*</sup>

# contributed equally

<sup>1</sup> Department of Psychiatry and Psychotherapy, Medical University of Vienna, Austria

<sup>2</sup> Department of Obstetrics and Gynecology, Medical University of Vienna, Austria

<sup>3</sup> Department of Rehabilitation Sciences, Hong Kong Polytechnic University, Hong Kong, China

|                                        |      |              |
|----------------------------------------|------|--------------|
| Word count                             | 248  | Abstract     |
|                                        | 3743 | Main section |
| Figures: 1, Tables: 1, References: 103 |      |              |

\*Correspondence to:

Prof. Rupert Lanzenberger, MD, PD

Email: [rupert.lanzenberger@meduniwien.ac.at](mailto:rupert.lanzenberger@meduniwien.ac.at)

ORCID: <https://orcid.org/0000-0003-4641-9539>

Medical University of Vienna, Department of Psychiatry and Psychotherapy, Austria

**Keywords:** insula, effective connectivity, interoception, gender dysphoria, gender-affirming hormone therapy

**NOTE:** This preprint reports new research that has not been certified by peer review and should not be used to guide clinical practice.

## Abstract

The influence of sex hormones on brain function has been investigated in multiple neuroimaging studies. Sexually dimorphic characteristics were found for the insular cortex, though little is known about hormonal effects on sex-specific functional connectivity patterns and insular functions ranging from emotion regulation to interoception and higher-level cognition. Thus, better understanding of direct sex steroid effects on insular connectivity remains essential. Thereby, gender-dysphoric individuals receiving gender-affirming hormone therapy represent an interesting cohort to address this gap in available knowledge.

To analyze the potential effect of sex steroids on insular connectivity at rest, 14 transgender women, 19 transgender men, 24 cisgender women, and 15 cisgender men were recruited. All participants underwent two magnetic resonance imaging sessions involving resting-state acquisitions separated by a median time period of 4.5 months. Between scans, transgender subjects received gender-affirming hormone therapy.

A seed based functional connectivity analysis revealed a significant 2-way interaction effect of group-by-time between right insula, cingulum, left middle frontal gyrus and left angular gyrus. Post-hoc tests revealed an increase in connectivity for transgender women when compared to cisgender men. Furthermore, spectral dynamic causal modelling showed reduced effective connectivity from the posterior cingulum and left angular gyrus to the left middle frontal gyrus as well as from the right insula to the left middle frontal gyrus.

These findings suggest a considerable influence of long-term estrogen administration and androgen suppression on brain networks implicated in interoception, own-body perception and higher-level cognition. Nevertheless, further studies are needed to shed light on the underlying mechanisms.

## 1. Introduction

The insula is located within the lateral sulcus of both hemispheres and covered by the frontoparietal and the temporal opercula. Given its afferent and efferent connections to multiple brain regions (e.g., the thalamus (1, 2), limbic (3-5) and cortical regions (6, 7)), it is associated with a wide range of functional processes.

The insula's broad structural connectivity is reflective of its wide range of functions. Highly dynamic processes involving the interaction of emotion and cognition (e.g., decision making) have been linked to the insula, encompassing the regulation of explicit emotional experiences and the integration of somatosensory as well as autonomic stimuli in the context of cognitive processing (8, 9). Studies using functional magnetic resonance imaging (fMRI) demonstrate functional and structural differences between insular subdivisions (10). As summarized by Uddin et al., meta-analyses on coactivation patterns of the insular cortex suggest the primary involvement of the ventral anterior part in affective regulation, whereas the dorsal anterior part is rather implicated in cognitive processing (11). Sensorimotor activation and interoceptive functions are largely attributed to the posterior insula (12-14). However, this tripartite parcellation is called into question by functional heterogeneity within certain subdivisions as well as the dense interconnection across them (10).

Alterations of the insula could be linked to a wide range of neuropsychiatric conditions. In a meta-analysis of voxel-based morphometry including 193 studies comprising scans from over 15800 patients suffering from schizophrenia, bipolar disorder, depression, addiction, obsessive-compulsive disorder or anxiety, Goodkind and colleagues found that the dorsal anterior cingulate, right insula, and left insula showed reductions of gray matter volume in all diagnostic categories, accompanied by poor executive functioning when compared to healthy controls. (15). Furthermore, the insula is suggested to be involved in the pathomechanism of affective disorders (16-18), probably due to its connection to regions implicated in emotion regulation (19). Additionally, pathologic alterations of the insula were found in substance use disorder (20), schizophrenia (21), autism spectrum disorder (22, 23) as well as

in the context of non-motor and neuropsychiatric symptoms of Parkinson's disease and various forms of dementia (24).

Looking at the brain as an organ with sexually dimorphic characteristics at every age, the influence of sex hormones (25-27) and non-hormonal effects of genes found on the X and Y chromosomes (28) have been addressed in various neuroimaging studies, underlining typical divergences between the brain of men and women, both in structure and function. Such differences were also found regarding the insula. Next to distinctive structural characteristics (29), several gender-related functional dissimilarities could be shown, e.g., in language (30) and affective processing (31), potentially playing a role for a wide range of neuropsychiatric conditions. In a structural MRI study, Klabunde and colleagues reported gender-related differences of the anterior circular sulcus of the insula in boys suffering from PTSD symptoms, showing larger volume and surface area than their healthy male counterparts. In contrast, smaller average volume and surface area could be detected in girls with PTSD when compared to control girls (32). Other morbidities associated with gender-specific insular differences are major depressive disorder (33), chronic pain (34), substance abuse (35) or migraine (36), just to name a few.

A unique possibility to further investigate the effects of sex hormones on brain structure and connectivity is given by cohorts diagnosed with gender dysphoria (GD) undergoing gender-affirming hormone therapy (GHT). As concisely reviewed by Kranz et al., GHT was shown to modulate brain structure and function in numerous ways (37). However, little is known about the effect of GHT on the insula, despite previous reports on its sex-specific characteristics. On a molecular level, Kranz et al. found a statistically significant reduction of insular MAO-A distribution volume in transgender men receiving exogenous testosterone (38), probably contributing to functional changes driven by altered neurotransmitter metabolism. A few fMRI studies reporting on sex-specific differences of insular connectivity were published, though sample sizes were small and highly varying study designs were used (39, 40).

The present study was implemented to investigate the potential influence of long-term GHT administration on insular connectivity at rest across four study groups encompassing transgender women and transgender men as well as two control groups comprising cisgender women and cisgender men.

## 2. Methods and Materials

This study was conducted according to the Declaration of Helsinki including all current revisions and the good scientific practice guidelines of the Medical University of Vienna. The protocol was approved by the institutional review board (EK Nr.: 1104/2016) and registered at [clinicaltrials.gov](https://clinicaltrials.gov) (NCT02715232).

### 2.1. Study Design

The study was conducted in a longitudinal design. All participants underwent two MRI sessions separated by a median of 4.5 months. Each session included structural, diffusion-weighted, task-based and resting-state MRI as well as spectroscopy. During the time between the two MRI sessions, transgender subjects received an individualized GHT treatment regimen that comprised the administration of testosterone and progestins (if menstruation still occurred) in transgender male participants, whereas transgender women received a steroidal antiandrogen and estradiol. Hormone levels were determined by blood draw at each MRI session.

#### ***Gender-affirming hormone therapy***

Hormone therapy was conducted according to the following protocol implemented at the Department of Obstetrics & Gynecology, Division of Gynecologic Endocrinology and Reproductive Medicine, Medical University of Vienna, Austria: Transgender men received either 1000mg testosterone undecanoate every 8-16 weeks (Nebido 1000mg/4ml i.m.), or alternatively up to 50mg testosterone daily (Testogel 50mg/day or Testavan 23mg/pump 1-2 pumps/day or testosterone crème as a magistral formula 12,5mg/pump 3-4 pumps/day transdermally). If menstruation still occurred, transgender men were treated with either lynestrenol (Orgametril 2-3 tablets/day) or desogestrel daily

(Moniq Gynial or Cerazette 0.075mg 1 tablet/day). Transgender women received cyproterone acetate daily (Androcur 50mg/day) and either estradiol transdermally (Estramon 100µg transdermal patch 2x/week or Estrogel gel 0.75-1.5 mg/day) or oral estradiol (Estrofem 2x2mg/day p.o.). Additionally, 2.5 mg of an alpha-5-reductase-inhibitor was administered every second day (Finasterid Actavis/Arcana/Aurobindo) in case of extensive hair loss. In selected cases, subjects received GnRH-analogues like triptorelin (decapeptyl 0.1mg/day subcutaneously).

### ***Sex hormones***

For monitoring sex hormone levels, luteinizing hormone, follicle-stimulating hormone, progesterone, estradiol, testosterone, sex hormone binding globulin and dehydroepiandrosterone sulfate were determined from the blood drawn before each MRI session. Testosterone, progesterone, and estradiol were used as covariates in the analyses.

## **2.2. Participants**

Transgender (TX) individuals seeking GHT were recruited from the Unit for Gender Identity Disorder at the General Hospital in Vienna. Control subjects were recruited via social media, designated message boards at the Medical University of Vienna and at other universities in Vienna. Cisgender men and cisgender women were age and education level matched to transgender men and transgender women, respectively. Inclusion criteria comprised a diagnosis of gender dysphoria according to the Diagnostic and Statistical Manual for Mental Disorders (transgender participants only), version 5 (DSM-5: 302.85) or the International Classification of Diseases, version 10 (ICD-10: F64.1); general health based on medical history, physical examination, electrocardiogram, laboratory screening and structural clinical interview (SCID) for DSM-IV Axis I. All participants gave written informed consent to partake in this study, were insured and received reimbursement for their participation. Participants were excluded in case of major neurological or internal illnesses, pregnancy, any kind of psychiatric diagnosis (cisgender controls) or severe DSM-IV Axis-I comorbidities (transgender subjects), steroid hormone treatment within 6 months prior to inclusion, treatment with psychotropic agents, clinically relevant abnormal

laboratory values, MRI contraindications, current substance abuse (excluding smoking), current or past substance-related disorder or non-compliance.

### 2.3. Data acquisition

All MRI data were recorded on a Siemens Prisma 3T scanner using a 64-channel head coil. A whole-brain T1-weighted scan TE / TR = 2.91 / 2000 ms; inversion time = 900 ms; flip angle = 9°; matrix = 240 x 256, 176 slices; 1.0 mm<sup>3</sup>; acquisition time = 7:59 min.

The resting-state data was acquired using the following parameters, TE / TR = 30 / 2050 ms; GRAPPA 2; 210 x 210 mm field of view, 100 x 100 pixel in-plane resolution; 35 axial slices of 2.8 mm (25% gap); flip angle 90°; orientation parallel to the anterior-posterior commissure line.

### 2.4. fMRI preprocessing

Each participant's data was preprocessed using the following steps: First, physiological artifacts were reduced using PESTICA (41). Further preprocessing steps were performed using SPM12 (<https://www.fil.ion.ucl.ac.uk/spm/software/spm12/>) using standard parameters. Slice-timing correction was performed to the temporal middle slice, followed by a two-pass realignment of both measurements per subject to the mean image. The images were then normalized to the Montreal Neurological Institute (MNI) standard space and resliced to 2.5 mm<sup>3</sup>. The BrainWavelet Toolbox (42) was used to reduce nonlinear artifact where "chsearch" was set to "harsh" for an increased artifact recognition and "threshold" was set to "20". The images were gray-matter masked with a custom template and finally smoothed using a Gaussian kernel of three times the resliced voxel size. Further processing steps included a Friston-24 model of motion correction (43) and an adapted compCor approach using an automatically derived number of combined white matter and cerebrospinal fluid regressors (44, 45).

## 2.5. Structural data preprocessing

In parallel, anatomical scans of all participants were preprocessed using the longitudinal recon-all stream (46) and segmented in subject space using FreeSurfer 6. Finally the right insula of each subject was identified. Furthermore, the time courses were then extracted from the each individuals preprocessed RS scans in subject space, corrected for all confounders (despiking, bandpass filter: 0.01-0.1 Hz, CompCor) and finally summarized to its first eigenvariate to match the preprocessing pipeline of the RS data.

## 2.6. Seed based connectivity and dynamic casual modelling

Seed based connectivity (SBC) was calculated using the time course previously extracted from the RS data. Here the anatomically defined right insula was used as the seed and was correlated with each of the RS pipeline processed voxels' time course. The resulting individual correlation maps were z-transformed and entered into a repeated-measures ANOVA model using SPM12. Interactions of group (FtM, MtF, FC, MC) by time (before and after min. 4 months of hormone therapy) were examined and the results were familywise-error-corrected to  $p_{\text{corr}} \leq 0.025$  (47). The interaction effects were estimated and post-hoc comparisons adjusted again using the Sidak method.

Effective connectivity was assessed using spectral dynamic casual modelling (DCM) implemented in SPM12, where the first temporal eigenvariates of clusters from the SBC analyses surviving multiplicity correction were extracted from the data preprocessed for the DCM analysis (48). Next, fully connected linear spectral two-state DCMs were estimated. The parametric empirical Bayes (PEB) framework in SPM12 was used for group inference. A flat PEB model was employed using free energy. Bayesian model averaging (49) was utilized to prune connections with high uncertainty posterior probability ( $P_p$ )  $< 0.99$ . Progesterone, testosterone and estradiol were used as covariates in both the repeated-measures ANOVA model and DCM, to account for the individualized GHT. For both the SBC and DCM analyses, each covariate was standardized, and group mean centered before being added to the above-mentioned models.



### 3. Results

Demographics and hormone levels are provided in Table 1. Fewer MtF and matched MC were recruited when compared to FtM and FC. At the second time point, MtF had a lower testosterone and higher progesterone and estradiol levels, whereas FtM had higher testosterone, lower progesterone and lower estradiol levels when compared to MC and FC groups.

#### 3.1. Effective and seed-based network connectivity effects

A significant 2-way interaction of group-by-time was discovered. Post-hoc test revealed that the right insula (seed region), cingulum ( $p_{corr} = 0.047$ ), left middle frontal gyrus (MFG;  $p_{corr} = 0.037$ ) and left angular gyrus (AG;  $p_{corr} = 0.028$ ) indicated a greater connectivity in the MtF group when compared to MC (Fig 1a). No significant interaction regarding FtM and FC were found.

A minimum of 4 months GHT induced changes in the effective connectivity for the MtF participants when compared to MC. An increase in effective connectivity from the right insula to the left angular gyrus and left middle frontal gyrus to the posterior cingulum (PC) was found. Furthermore, decreases were discovered from the posterior cingulum and left angular gyrus respectively to the left middle frontal gyrus. Finally, a very slight decrease in effective connectivity from the right insula to the left middle frontal gyrus was revealed; see Fig 1b for a graphical representation.

### 4. Discussion

The current study aimed to assess changes to effective connectivity of the insula at rest under gender-affirming hormone treatment. In a seed-based analysis, we found that in comparison to cisgender males, MtF subjects showed an increase in effective connectivity from the right insula to the left AG and from the left MFG to the PC at rest after receiving GHT. In the same cohort, decreased effective connectivity could be shown both from the PC as well as the left AG to the left MFG and from the right insula to the left MFG. Here, we aim to discuss potential interpretations of our data in view of previously published findings on functional characteristics of the insula, MFG, AG and PC.

### ***Interoception and own-body perception***

Interoception is the ability to recognize and process inner sensations of the body. It is strongly associated with own-body perception (50). As reviewed by Berntson et al., interoception is a highly complex central nervous function involving the identification, processing and integration of signals from peripheral chemo-, mechano-, osmo- and humoral receptors via different neuronal pathways, networks and circuits (51). Looking at the integration of sensory input to orchestrate behavior and attention, both the central autonomic network (see review by Beissner et al. (52) or Bonaz et al. (53)) as well as the salience network (SN) need to be taken into account (54). As suggested by Menon and Uddin, the SN segregates the most important among internal and external signals, aiming to coordinate behavior and associated reactions (55). At rest, also the default mode network (DMN) was suggested to be highly relevant for self-referential mental activity (56).

As an essential component of both the CAN (57) as well as the SN (58), the insular cortex is functionally implicated in somatosensory information processing (59) and interoception (14, 60-62). Although the SN was shown to work independently of the DMN, co-activation patterns were demonstrated between the posterior insula and the DMN (63). Here, we found an increase in effective connectivity of the insula to the left AG at rest in transgender women when compared to male controls after GHT treatment. The AG, one of the major connecting hubs within the human brain, is implicated in a large variety of processes, involving multiple aspects of higher-level cognition (64). Besides the widely known role of the angular gyrus in, e.g., autobiographic and semantic memory, arithmetic tasks, semantic processing as well as visuospatial navigation (see review by Seghier (65)), Burke and colleagues found significantly higher AG-activation in healthy adults while performing the so-called body localizer task, implemented to localize brain regions that are active while pictures of the own and other human bodies are presented and processed (66), suggesting a role of the AG in visual body perception. Own-body perception is a highly interesting task in the context of gender dysphoric patients who experience incongruence between their sex assigned at birth and their experienced gender.

Additionally, higher effective connectivity between the left MFG and the PC was shown. With connections to the CAN and as part of the salience system, the cingulum is one of the core interoceptive areas of the human brain (67). For instance, de la Fuente et al. found that grey matter volume of the left PC positively correlated with interoceptive accuracy in an addiction study where the relationship between cardiac interoception and cocaine dependence was assessed to define neurocognitive markers of interoceptive tuning using structural and functional MRI (68). Interestingly, we also found a decrease in effective connectivity, namely in the PC as well as the left AG towards the left MFG and from the right insula to the left MFG. The connectivity changes between these regions may be interpreted as a balancing communication pattern within the DMN. On the other hand, altered inter-network-communication pathways after GHT could be discussed between the DMN, CAN and SN. The mentioned effects were detected after GHT, suggesting an influence of cross-sex hormone therapy on selected regions and networks within the brain that are centrally involved in interoceptive processing. Interoception is an aspect of paramount importance in the treatment of gender dysphoria due to its relevance for own-body perception. In a study that addressed brain network connectivity patterns involved in own-body perception across gender-dysphoric patients and cisgender controls, Feusner et al. investigated the relation of DMN and SN activity to self-perception ratings using images of the subject's own body that were modified towards the opposite gender (69). The results pointed towards altered connectivity within networks involved in own-body perception in the context of self in GD. However, own-body perception in particular and interoception in general are not only relevant for GD, but seem to play a crucial role in a multitude of psychiatric diseases, e.g., anorexia nervosa (70), anxiety (71) and major depression (72). These conditions show higher prevalence rates in females and phenotypic differences are well documented (73) with women paying more attention to interoceptive sensations than men while showing worse interoceptive accuracy for certain tasks (74, 75).

As discussed by Murphy et al., the interaction of hormonal changes and their relation to interoception could be of interest when exploring the physiologic mechanisms behind gender differences in

psychiatric conditions (76). In a study that aimed to investigate gender-related differences in functional connectivity at rest, Sie et al. revealed that females in the early-adulthood stage show stronger negative resting-state functional connectivity between the right anterior insula and the medial DMN than males, suggesting a relevance of sex when looking at resting-state network connectivity linked to interoceptive processes (77). In our sample, the long-term administration of estrogens and androgen blockers in transgender women similarly resulted in altered connectivity patterns of the insula as well as other brain regions that are implicated in DMN activity.

### ***Language, literacy and semantic processing***

The regions exhibiting altered effective connectivity at rest after long-term feminization via estrogen treatment and androgen-blocker administration in transgender women are all known to be implicated in at least one aspect of language processing. Since gender differences in this cognitive domain were discussed in a multitude of neuroimaging and neurolinguistic publications, the effect of exogenous estrogen on language processing needs to be considered in view of the present data.

As stated by Chong and coworkers, the functional heterogeneity of the insular cortex and its activation patterns both in task-based approaches as well as resting-state analyses point towards a role as an interface coordinating the interpretation of and reaction to external stimuli involved in general cognition as well as affective and sensory-motor processing (78), which is relevant for, e.g., emotion regulation (79), goal-directed cognition (80) and linguistic processing (81). In the context of language, Ardila et al. found that both the right and the left insula were implicated in certain language-related activation patterns, such as language production, understanding and repetition as well as lexico-semantic associations (82). As reported in two meta-analyses (83, 84), also the left AG has been associated with semantic processing. Furthermore, it plays a critical role in reading comprehension (85), semantic memory (86) and understanding of speech (87). Furthermore, the left middle frontal gyrus was associated with the development of literacy (88), a region that showed an increased effective connectivity towards the posterior cingulum. The alterations in effective connectivity

comprising the insula, the left AG, the left MFG, and the PC could be a direct effect of the administration of estrogen in the scope of GHT.

Despite conflicting results on gender aspects of language and the assumption that linguistic processing follows a sexually dimorphic activation pattern within the brain, many authors suggested a female advantage in language-related tasks, especially in verbal fluency tasks (89). One explanation that gained attention in this regard is the assumption that women show a more pronounced bihemispheric representation of language than men (90-92). In addition to studies on language lateralization, also gender-specific differences in intrahemispheric activation patterns were discussed (93).

Here, we suggest that the long-term administration of estrogen resulted in an increase of effective connectivity at rest within certain networks known to be involved in verbal memory and linguistic processing. These findings are in line with results from an fMRI study investigating cerebral activation in language processing, where Sommer et al. found that total language activity correlated with estrogen levels after GHT (94). Another explanation that needs to be addressed is the possible effect of androgen blockade. As reported by Cherrier et al., androgen suppression was associated with better performance in verbal memory in men with prostate cancer (95). Studies on linguistic capacities in the course of the menstrual cycle also support the idea of better language performance when estrogen levels are high, whereas androgen levels are low (96).

Since the abovementioned connectivity changes over time were only true for transgender, but not for cisgender women, it could be hypothesized that exogenously administered estrogen or androgen blockers enhanced synaptic plasticity in a multimodal manner. However, further studies need to be done to explore the underlying mechanisms, e.g., whether estrogen administration affects endothelial receptor density (97, 98), grey matter volume (99), white matter microstructure (100), alterations of intra-cerebral estrogen synthesis (101) and the interaction with certain neurotransmitter systems such as the serotonergic system (102, 103).

### ***Limitations***

The results presented here should be seen in light of some limitations. Due to recruitment difficulties, transgender subgroups were considerably imbalanced.

Additionally, it is hardly possible to determine if the interaction effects presented here could have been influenced by mood changes and improved own-body perception in the course of transition.

## 5. Conclusion

The present study revealed that after long-term estrogen administration and anti-androgen treatment in the context of gender-affirming hormone therapy, transgender women showed significant changes of resting-state connectivity between the right insula, left AG, left MFG and PC when compared to cisgender male controls, suggesting a considerable influence of GHT on brain networks implicated in interoception, own-body perception and higher-level cognition as it is needed for language processing. Investigations considering the underlying mechanisms on a molecular level are needed to sufficiently understand the interplay of GHT, gender dysphoria and functional connectivity.

## 6. Acknowledgements and funding

This research was funded in whole, or in part, by the Austrian Science Fund (FWF) grant number KLI 504 to Rupert Lanzenberger., the Medical Imaging Cluster of the Medical University of Vienna, and by the grant „Interdisciplinary translational brain research cluster (ITHC) with highfield MR" from the Federal Ministry of Science, Research and Economy (BMWFV), Austria. For the purpose of open access, the author has applied a CC BY public copyright licence to any Author Accepted Manuscript version arising from this submission. MB. Reed is a recipient of a DOC fellowship of the Austrian Academy of Sciences at the Department of Psychiatry and Psychotherapy, Medical University of Vienna. We thank the graduated team members and the diploma students of the Neuroimaging Lab (NIL, headed by R. Lanzenberger) as well as the clinical colleagues from the Department of Psychiatry and Psychotherapy of the Medical University of Vienna for clinical and/or administrative support. In particular, we would like to thank B. Spurny-Dworak as well as R. Seiger for technical support and V. Ritter for administrative help.

## 7. Conflict of interest

With relevance to this work there is no conflict of interest to declare. R. Lanzenberger received travel grants and/or conference speaker honoraria within the last three years from Bruker BioSpin MR, Heel,

and support from Siemens Healthcare regarding clinical research using PET/MR. He is a shareholder of the start-up company BM Health GmbH since 2019.

## 8. References

1. Mufson EJ, Mesulam MM. Thalamic connections of the insula in the rhesus monkey and comments on the paralimbic connectivity of the medial pulvinar nucleus. *The Journal of comparative neurology*. 1984;227(1):109-20.
2. Jakab A, Molnár PP, Bogner P, Béres M, Berényi EL. Connectivity-based parcellation reveals interhemispheric differences in the insula. *Brain topography*. 2012;25(3):264-71.
3. Aggleton JP, Burton MJ, Passingham RE. Cortical and subcortical afferents to the amygdala of the rhesus monkey (*Macaca mulatta*). *Brain research*. 1980;190(2):347-68.
4. Nomi JS, Schettini E, Broce I, Dick AS, Uddin LQ. Structural Connections of Functionally Defined Human Insular Subdivisions. *Cerebral Cortex*. 2017;28(10):3445-56.
5. Insausti R, Amaral DG, Cowan WM. The entorhinal cortex of the monkey: II. Cortical afferents. *The Journal of comparative neurology*. 1987;264(3):356-95.
6. Augustine JR. The insular lobe in primates including humans. *Neurological research*. 1985;7(1):2-10.
7. Mesulam MM, Mufson EJ. Insula of the old world monkey. III: Efferent cortical output and comments on function. *The Journal of comparative neurology*. 1982;212(1):38-52.
8. Dolan RJ. Emotion, cognition, and behavior. *Science (New York, NY)*. 2002;298(5596):1191-4.
9. Namkung H, Kim SH, Sawa A. The Insula: An Underestimated Brain Area in Clinical Neuroscience, Psychiatry, and Neurology. *Trends in neurosciences*. 2017;40(4):200-7.
10. Uddin LQ, Kinnison J, Pessoa L, Anderson ML. Beyond the tripartite cognition-emotion-interoception model of the human insular cortex. *Journal of cognitive neuroscience*. 2014;26(1):16-27.
11. Chang LJ, Yarkoni T, Khaw MW, Sanfey AG. Decoding the role of the insula in human cognition: functional parcellation and large-scale reverse inference. *Cerebral cortex (New York, NY : 1991)*. 2013;23(3):739-49.
12. Drzezga A, Darsow U, Treede RD, Siebner H, Frisch M, Munz F, et al. Central activation by histamine-induced itch: analogies to pain processing: a correlational analysis of O-15 H<sub>2</sub>O positron emission tomography studies. *Pain*. 2001;92(1-2):295-305.
13. Brooks JCW, Nurmikko TJ, Bimson WE, Singh KD, Roberts N. fMRI of Thermal Pain: Effects of Stimulus Laterality and Attention. *NeuroImage*. 2002;15(2):293-301.
14. Craig AD. How do you feel? Interoception: the sense of the physiological condition of the body. *Nature Reviews Neuroscience*. 2002;3(8):655-66.
15. Goodkind M, Eickhoff SB, Oathes DJ, Jiang Y, Chang A, Jones-Hagata LB, et al. Identification of a common neurobiological substrate for mental illness. *JAMA psychiatry*. 2015;72(4):305-15.
16. Liu Z, Xu C, Xu Y, Wang Y, Zhao B, Lv Y, et al. Decreased regional homogeneity in insula and cerebellum: a resting-state fMRI study in patients with major depression and subjects at high risk for major depression. *Psychiatry research*. 2010;182(3):211-5.
17. Stratmann M, Konrad C, Kugel H, Krug A, Schöning S, Ohrmann P, et al. Insular and hippocampal gray matter volume reductions in patients with major depressive disorder. *PloS one*. 2014;9(7):e102692.
18. Yin Z, Chang M, Wei S, Jiang X, Zhou Y, Cui L, et al. Decreased functional connectivity in insular subregions in depressive episodes of bipolar disorder and major depressive disorder. *Frontiers in neuroscience*. 2018;12:842.
19. Golkar A, Lonsdorf TB, Olsson A, Lindstrom KM, Berrebi J, Fransson P, et al. Distinct contributions of the dorsolateral prefrontal and orbitofrontal cortex during emotion regulation. *PloS one*. 2012;7(11):e48107.
20. Viswanath H, Velasquez KM, Savjani R, Molfese DL, Curtis K, Molfese PJ, et al. Interhemispheric insular and inferior frontal connectivity are associated with substance abuse in a psychiatric population. *Neuropharmacology*. 2015;92:63-8.



21. Moran LV, Tagamets MA, Sampath H, O'Donnell A, Stein EA, Kochunov P, et al. Disruption of anterior insula modulation of large-scale brain networks in schizophrenia. *Biological psychiatry*. 2013;74(6):467-74.
22. Ebisch SJ, Gallese V, Willems RM, Mantini D, Groen WB, Romani GL, et al. Altered intrinsic functional connectivity of anterior and posterior insula regions in high-functioning participants with autism spectrum disorder. *Human brain mapping*. 2011;32(7):1013-28.
23. Uddin LQ, Supekar K, Lynch CJ, Cheng KM, Odriozola P, Barth ME, et al. Brain State Differentiation and Behavioral Inflexibility in Autism. *Cerebral cortex (New York, NY : 1991)*. 2015;25(12):4740-7.
24. Fathy YY, Hoogers SE, Berendse HW, van der Werf YD, Visser PJ, de Jong FJ, et al. Differential insular cortex sub-regional atrophy in neurodegenerative diseases: a systematic review and meta-analysis. *Brain Imaging and Behavior*. 2020;14(6):2799-816.
25. Witte AV, Savli M, Holik A, Kasper S, Lanzenberger R. Regional sex differences in grey matter volume are associated with sex hormones in the young adult human brain. *Neuroimage*. 2010;49(2):1205-12.
26. Toffoletto S, Lanzenberger R, Gingnell M, Sundström-Poromaa I, Comasco E. Emotional and cognitive functional imaging of estrogen and progesterone effects in the female human brain: a systematic review. *Psychoneuroendocrinology*. 2014;50:28-52.
27. Heany SJ, van Honk J, Stein DJ, Brooks SJ. A quantitative and qualitative review of the effects of testosterone on the function and structure of the human social-emotional brain. 2016;31(1):157-67.
28. Sigurdardottir HL, Lanzenberger R, Kranz GS. Genetics of sex differences in neuroanatomy and function. *Handbook of clinical neurology*. 2020;175:179-93.
29. Ruigrok ANV, Salimi-Khorshidi G, Lai M-C, Baron-Cohen S, Lombardo MV, Tait RJ, et al. A meta-analysis of sex differences in human brain structure. *Neuroscience & Biobehavioral Reviews*. 2014;39:34-50.
30. Harrington GS, Farias ST. Sex differences in language processing: Functional MRI methodological considerations. *Journal of Magnetic Resonance Imaging*. 2008;27(6):1221-8.
31. Duerden EG, Arsalidou M, Lee M, Taylor MJ. Lateralization of affective processing in the insula. *NeuroImage*. 2013;78:159-75.
32. Klabunde M, Weems CF, Raman M, Carrion VG. The moderating effects of sex on insula subdivision structure in youth with posttraumatic stress symptoms. *Depression and anxiety*. 2017;34(1):51-8.
33. Eisenberger NI, Inagaki TK, Rameson LT, Mashal NM, Irwin MR. An fMRI study of cytokine-induced depressed mood and social pain: The role of sex differences. *NeuroImage*. 2009;47(3):881-90.
34. Gupta A, Mayer EA, Fling C, Labus JS, Naliboff BD, Hong J-Y, et al. Sex-based differences in brain alterations across chronic pain conditions. *Journal of Neuroscience Research*. 2017;95(1-2):604-16.
35. Tanabe J, York P, Krmpotich T, Miller D, Dalwani M, Sakai JT, et al. Insula and Orbitofrontal Cortical Morphology in Substance Dependence Is Modulated by Sex. *American Journal of Neuroradiology*. 2013;34(6):1150-6.
36. Maleki N, Linnman C, Brawn J, Burstein R, Becerra L, Borsook D. Her versus his migraine: multiple sex differences in brain function and structure. *Brain*. 2012;135(8):2546-59.
37. Kranz GS, Zhang BB, Handschuh P, Ritter V, Lanzenberger R. Gender-affirming hormone treatment—A unique approach to study the effects of sex hormones on brain structure and function. *Cortex*. 2020;129:68-79.
38. Kranz GS, Spies M, Vracka C, Kaufmann U, Klebermass E-M, Handschuh PA, et al. High-dose testosterone treatment reduces monoamine oxidase A levels in the human brain: A preliminary report. *Psychoneuroendocrinology*. 2021;133:105381.
39. Mueller SC, Wierckx K, Jackson K, T'Sjoen G. Circulating androgens correlate with resting-state MRI in transgender men. *Psychoneuroendocrinology*. 2016;73:91-8.

40. Smith E, Junger J, Pauly K, Kellermann T, Neulen J, Neuschaefer-Rube C, et al. Gender incongruence and the brain – Behavioral and neural correlates of voice gender perception in transgender people. *Hormones and Behavior*. 2018;105:11-21.
41. Beall EB, Lowe MJ. Isolating physiologic noise sources with independently determined spatial measures. *Neuroimage*. 2007;37(4):1286-300.
42. Patel AX, Kundu P, Rubinov M, Jones PS, Vértes PE, Ersche KD, et al. A wavelet method for modeling and despiking motion artifacts from resting-state fMRI time series. *Neuroimage*. 2014;95:287-304.
43. Friston KJ, Williams S, Howard R, Frackowiak RS, Turner R. Movement-related effects in fMRI time-series. *Magnetic resonance in medicine*. 1996;35(3):346-55.
44. Behzadi Y, Restom K, Liao J, Liu TT. A component based noise correction method (CompCor) for BOLD and perfusion based fMRI. *Neuroimage*. 2007;37(1):90-101.
45. Klöbl M, Michenthaler P, Godbersen GM, Robinson S, Hahn A, Lanzenberger R. Reinforcement and punishment shape the learning dynamics in fMRI neurofeedback. *Frontiers in Human Neuroscience*. 2020;14:304.
46. Reuter M, Schmansky NJ, Rosas HD, Fischl B. Within-subject template estimation for unbiased longitudinal image analysis. *Neuroimage*. 2012;61(4):1402-18.
47. Chen G, Cox RW, Glen DR, Rajendra JK, Reynolds RC, Taylor PA. A tail of two sides: Artificially doubled false positive rates in neuroimaging due to the sidedness choice with t-tests. *Human Brain Mapping*. 2019;40(3):1037-43.
48. Klöbl M, Seiger R, Vanicek T, Handschuh P, Reed MB, Spurny-Dworak B, et al. Escitalopram modulates learning content-specific neuroplasticity of functional brain networks. *NeuroImage*. 2022;247:118829.
49. Friston KJ, Litvak V, Oswal A, Razi A, Stephan KE, van Wijk BCM, et al. Bayesian model reduction and empirical Bayes for group (DCM) studies. *NeuroImage*. 2016;128:413-31.
50. Badoud D, Tsakiris M. From the body's viscera to the body's image: Is there a link between interoception and body image concerns? *Neuroscience & Biobehavioral Reviews*. 2017;77:237-46.
51. Berntson GG, Khalsa SS. Neural Circuits of Interoception. *Trends in neurosciences*. 2021;44(1):17-28.
52. Beissner F, Meissner K, Bär K-J, Napadow V. The Autonomic Brain: An Activation Likelihood Estimation Meta-Analysis for Central Processing of Autonomic Function. *The Journal of Neuroscience*. 2013;33(25):10503.
53. Bonaz B, Lane RD, Oshinsky ML, Kenny PJ, Sinha R, Mayer EA, et al. Diseases, Disorders, and Comorbidities of Interoception. *Trends in neurosciences*. 2021;44(1):39-51.
54. Peters SK, Dunlop K, Downar J. Cortico-Striatal-Thalamic Loop Circuits of the Salience Network: A Central Pathway in Psychiatric Disease and Treatment. *Frontiers in Systems Neuroscience*. 2016;10(104).
55. Menon V, Uddin LQ. Saliency, switching, attention and control: a network model of insula function. *Brain structure & function*. 2010;214(5-6):655-67.
56. Davey CG, Pujol J, Harrison BJ. Mapping the self in the brain's default mode network. *NeuroImage*. 2016;132:390-7.
57. Thayer JF, Lane RD. A model of neurovisceral integration in emotion regulation and dysregulation. *Journal of affective disorders*. 2000;61(3):201-16.
58. Seeley WW, Menon V, Schatzberg AF, Keller J, Glover GH, Kenna H, et al. Dissociable intrinsic connectivity networks for salience processing and executive control. *The Journal of neuroscience : the official journal of the Society for Neuroscience*. 2007;27(9):2349-56.
59. Gelnar PA, Krauss BR, Sheehe PR, Szeverenyi NM, Apkarian AV. A comparative fMRI study of cortical representations for thermal painful, vibrotactile, and motor performance tasks. *Neuroimage*. 1999;10(4):460-82.
60. Wiebking C, Bauer A, de Greck M, Duncan NW, Tempelmann C, Northoff G. Abnormal body perception and neural activity in the insula in depression: An fMRI study of the depressed "material me". *The World Journal of Biological Psychiatry*. 2010;11(3):538-49.

61. Zaki J, Davis JJ, Ochsner KN. Overlapping activity in anterior insula during interoception and emotional experience. *NeuroImage*. 2012;62(1):493-9.
62. Critchley HD, Corfield DR, Chandler MP, Mathias CJ, Dolan RJ. Cerebral correlates of autonomic cardiovascular arousal: a functional neuroimaging investigation in humans. *The Journal of physiology*. 2000;523 Pt 1(Pt 1):259-70.
63. Harrison BJ, Pujol J, Contreras-Rodríguez O, Soriano-Mas C, López-Solà M, Deus J, et al. Task-induced deactivation from rest extends beyond the default mode brain network. *PloS one*. 2011;6(7):e22964.
64. Fjell AM, Westlye LT, Amlien I, Tamnes CK, Grydeland H, Engvig A, et al. High-Expanding Cortical Regions in Human Development and Evolution Are Related to Higher Intellectual Abilities. *Cerebral Cortex*. 2015;25(1):26-34.
65. Seghier ML. The angular gyrus: multiple functions and multiple subdivisions. *The Neuroscientist : a review journal bringing neurobiology, neurology and psychiatry*. 2013;19(1):43-61.
66. Burke SM, Majid DSA, Manzouri AH, Moody T, Feusner JD. Sex differences in own and other body perception. 2019;40(2):474-88.
67. Benarroch EE. The central autonomic network: functional organization, dysfunction, and perspective. *Mayo Clinic proceedings*. 1993;68(10):988-1001.
68. de la Fuente A, Sedeño L, Vignaga SS, Ellmann C, Sonzogni S, Belluscio L, et al. Multimodal neurocognitive markers of interoceptive tuning in smoked cocaine. 2019;44(8):1425-34.
69. Feusner JD, Lidström A, Moody TD, Dhejne C, Bookheimer SY, Savic I. Intrinsic network connectivity and own body perception in gender dysphoria. *Brain Imaging Behav*. 2017;11(4):964-76.
70. Pollatos O, Kurz A-L, Albrecht J, Schreder T, Kleemann AM, Schöpf V, et al. Reduced perception of bodily signals in anorexia nervosa. *Eating behaviors*. 2008;9(4):381-8.
71. Paulus MP, Stein MB. Interoception in anxiety and depression. *Brain Structure and Function*. 2010;214(5):451-63.
72. Khalsa SS, Adolphs R, Cameron OG, Critchley HD, Davenport PW, Feinstein JS, et al. Interoception and Mental Health: A Roadmap. *Biological Psychiatry: Cognitive Neuroscience and Neuroimaging*. 2018;3(6):501-13.
73. Afifi M. Gender differences in mental health. *Singapore medical journal*. 2007;48(5):385.
74. Grabauskaitė A, Baranauskas M, Griškova-Bulanova I. Interoception and gender: What aspects should we pay attention to? *Consciousness and Cognition*. 2017;48:129-37.
75. Longarzo M, Mele G, Alfano V, Salvatore M, Cavaliere C. Gender Brain Structural Differences and Interoception. *Frontiers in Neuroscience*. 2021;14(1353).
76. Murphy J, Viding E, Bird G. Does atypical interoception following physical change contribute to sex differences in mental illness? *Psychological Review*. 2019;126(5):787-9.
77. Sie J-H, Chen Y-H, Shiao Y-H, Chu W-C. Gender- and Age-Specific Differences in Resting-State Functional Connectivity of the Central Autonomic Network in Adulthood. *Frontiers in Human Neuroscience*. 2019;13(369).
78. Chong JSX, Ng GJP, Lee SC, Zhou J. Salience network connectivity in the insula is associated with individual differences in interoceptive accuracy. *Brain Structure and Function*. 2017;222(4):1635-44.
79. Lutz J, Herwig U, Opialla S, Hittmeyer A, Jäncke L, Rufer M, et al. Mindfulness and emotion regulation—an fMRI study. *Social Cognitive and Affective Neuroscience*. 2013;9(6):776-85.
80. Duncan J, Owen AM. Common regions of the human frontal lobe recruited by diverse cognitive demands. *Trends in neurosciences*. 2000;23(10):475-83.
81. Oh A, Duerden EG, Pang EW. The role of the insula in speech and language processing. *Brain and Language*. 2014;135:96-103.
82. Ardila A, Bernal B, Rosselli M. Participation of the insula in language revisited: A meta-analytic connectivity study. *Journal of Neurolinguistics*. 2014;29:31-41.
83. Binder JR, Desai RH, Graves WW, Conant LL. Where is the semantic system? A critical review and meta-analysis of 120 functional neuroimaging studies. *Cerebral cortex (New York, NY : 1991)*. 2009;19(12):2767-96.

84. Vigneau M, Beaucousin V, Hervé PY, Duffau H, Crivello F, Houdé O, et al. Meta-analyzing left hemisphere language areas: phonology, semantics, and sentence processing. *Neuroimage*. 2006;30(4):1414-32.
85. Houdé O, Rossi S, Lubin A, Joliot M. Mapping numerical processing, reading, and executive functions in the developing brain: an fMRI meta-analysis of 52 studies including 842 children. *Developmental science*. 2010;13(6):876-85.
86. Bonnici HM, Richter FR, Yazar Y, Simons JS. Multimodal feature integration in the angular gyrus during episodic and semantic retrieval. *Journal of Neuroscience*. 2016;36(20):5462-71.
87. Obleser J, Kotz SA. Expectancy constraints in degraded speech modulate the language comprehension network. *Cerebral cortex (New York, NY : 1991)*. 2010;20(3):633-40.
88. Koyama MS, O'Connor D, Shehzad Z, Milham MP. Differential contributions of the middle frontal gyrus functional connectivity to literacy and numeracy. *Scientific reports*. 2017;7(1):17548.
89. Hyde JS, Linn MC. Gender differences in verbal ability: a meta-analysis. *Psychological bulletin*. 1988;104(1):53.
90. Frost JA, Binder JR, Springer JA, Hammeke TA, Bellgowan PSF, Rao SM, et al. Language processing is strongly left lateralized in both sexes: Evidence from functional MRI. *Brain*. 1999;122(2):199-208.
91. Nenert R, Allendorfer JB, Martin AM, Banks C, Vannest J, Holland SK, et al. Age-related language lateralization assessed by fMRI: The effects of sex and handedness. *Brain research*. 2017;1674:20-35.
92. Baxter LC, Saykin AJ, Flashman LA, Johnson SC, Guerin SJ, Babcock DR, et al. Sex differences in semantic language processing: A functional MRI study. *Brain and Language*. 2003;84(2):264-72.
93. Kimura D. Sex differences in cerebral organization for speech and praxic functions. *Canadian Journal of Psychology/Revue canadienne de psychologie*. 1983;37(1):19.
94. Sommer IEC, Cohen-Kettenis PT, van Raalten T, vd Veer AJ, Ramsey LE, Gooren LJG, et al. Effects of cross-sex hormones on cerebral activation during language and mental rotation: An fMRI study in transsexuals. *European Neuropsychopharmacology*. 2008;18(3):215-21.
95. Cherrier M, Rose A, Higano C. The effects of combined androgen blockade on cognitive function during the first cycle of intermittent androgen suppression in patients with prostate cancer. *The Journal of urology*. 2003;170(5):1808-11.
96. Hampson E, Kimura D. Reciprocal effects of hormonal fluctuations on human motor and perceptual-spatial skills. *Behavioral neuroscience*. 1988;102(3):456.
97. Dietrich T, Krings T, Neulen J, Willmes K, Erberich S, Thron A, et al. Effects of Blood Estrogen Level on Cortical Activation Patterns during Cognitive Activation as Measured by Functional MRI. *NeuroImage*. 2001;13(3):425-32.
98. Khalil RA. Estrogen, vascular estrogen receptor and hormone therapy in postmenopausal vascular disease. *Biochemical pharmacology*. 2013;86(12):1627-42.
99. Holmes D. Cross-sex hormones alter grey matter structures. *Nature Reviews Endocrinology*. 2016;12(12):686-.
100. Kranz GS, Seiger R, Kaufmann U, Hummer A, Hahn A, Ganger S, et al. Effects of sex hormone treatment on white matter microstructure in individuals with gender dysphoria. *Neuroimage*. 2017;150:60-7.
101. Hojo Y, Murakami G, Mukai H, Higo S, Hatanaka Y, Ogiue-Ikeda M, et al. Estrogen synthesis in the brain--role in synaptic plasticity and memory. *Molecular and cellular endocrinology*. 2008;290(1-2):31-43.
102. Kranz GS, Hahn A, Baldinger P, Haeusler D, Philippe C, Kaufmann U, et al. Cerebral serotonin transporter asymmetry in females, males and male-to-female transsexuals measured by PET in vivo. *Brain structure & function*. 2014;219(1):171-83.
103. Kranz GS, Rami-Mark C, Kaufmann U, Baldinger P, Hahn A, Hoflich A, et al. Effects of hormone replacement therapy on cerebral serotonin-1A receptor binding in postmenopausal women examined with [carbonyl-(1)(1)C]WAY-100635. *Psychoneuroendocrinology*. 2014;45:1-10.



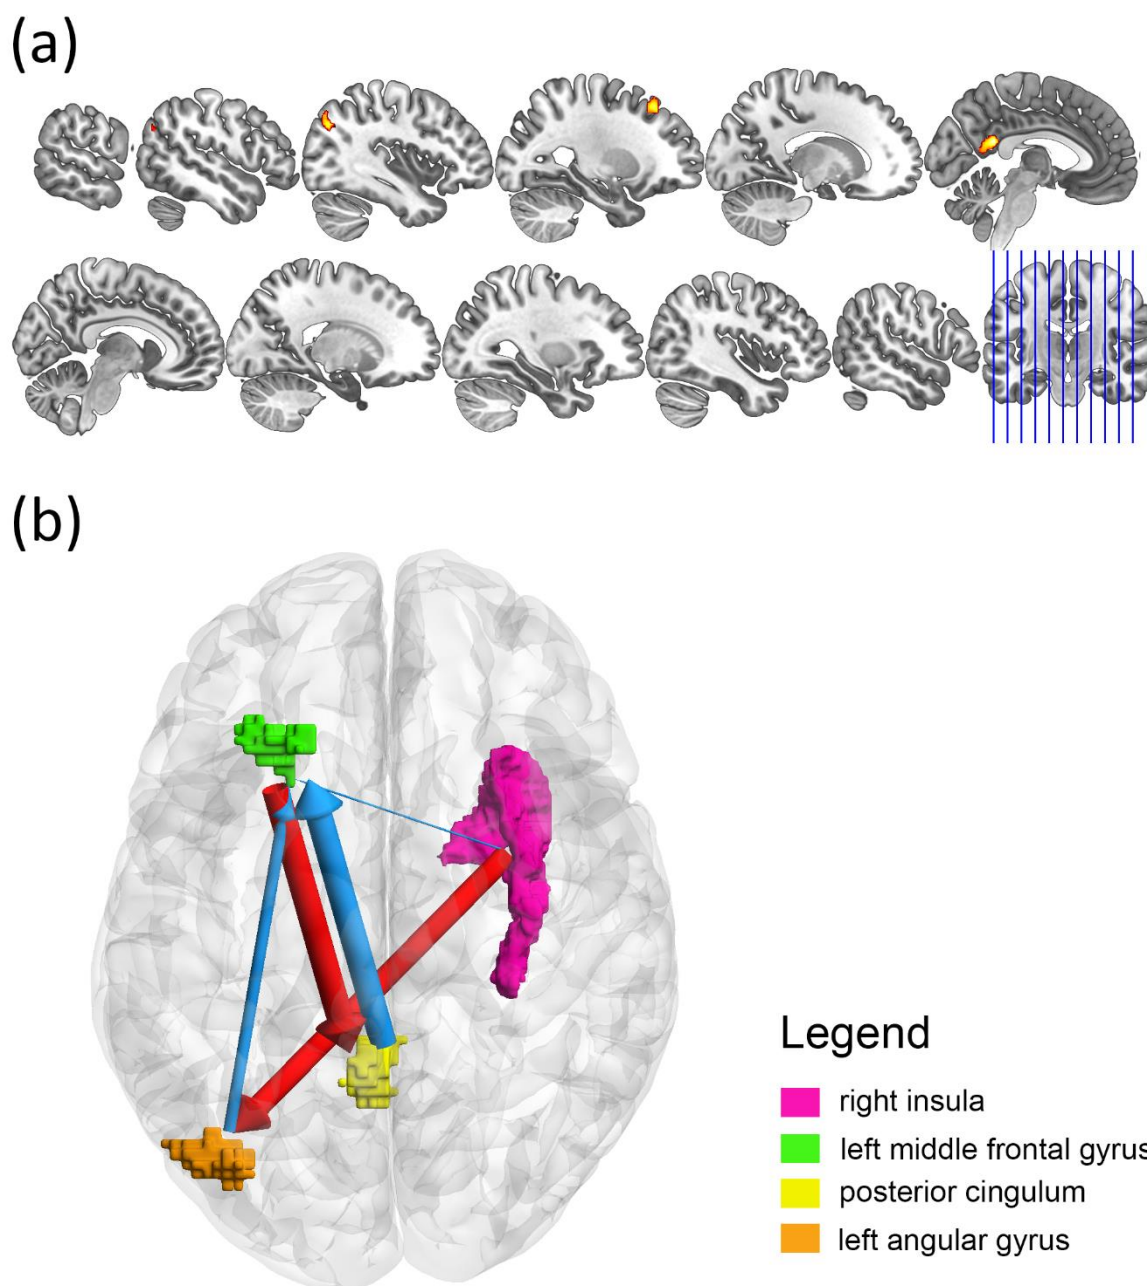

Figure 1: Seed-based and Effective Connectivity. (a) Regions that showed a significant group-by-time interaction with the seed region of the right insula (purple). After a minimum of 4 months an increase in connectivity was found in the posterior cingulum ( $p_{corr} = 0.047$  | yellow), left middle frontal gyrus ( $p_{corr} = 0.037$  | green) and left angular gyrus ( $p_{corr} = 0.028$  | orange) for the MtF participants in comparison to the male controls. (b) Indicates the effective connectivity interaction effects in relation to the reference conditions i.e. after a minimum of 4 months of hormone therapy where MtF participants were compared to male controls. Increases in effective connectivity are indicated in red and decreases in blue. Line thickness represents the strength of the effective connectivity difference. All effects have a > 99 % posterior probability.

|                             | cisgender women |                | cisgender men |               | transgender women |                 | transgender men |               |
|-----------------------------|-----------------|----------------|---------------|---------------|-------------------|-----------------|-----------------|---------------|
| <b>N</b>                    | 24              |                | 15            |               | 14                |                 | 19              |               |
| <b>Age [years]</b>          | 25.09 ± 6.33    |                | 27.40 ± 7.22  |               | 27.15 ± 13.54     |                 | 24.95 ± 7.55    |               |
|                             | Pre             | Post           | Pre           | Post          | Pre               | Post            | Pre             | Post          |
| <b>DHEAS (µg/ml)</b>        | 3.04 ± 0.95     | 3.06 ± 1.05    | 3.99 ± 1.72   | 4.03 ± 1.38   | 3.87 ± 1.16       | 3.64 ± 1.39     | 3.17 ± 2.01     | 3.32 ± 1.94   |
| <b>Estradiol (pg/ml)</b>    | 79.76 ± 54.59   | 105.86 ± 74.12 | 25.63 ± 10.21 | 22.63 ± 8.16  | 45.70 ± 47.66     | 271.09 ± 309.90 | 106.34 ± 73.62  | 59.57 ± 51.72 |
| <b>FSH (µU/ml)</b>          | 4.95 ± 1.32     | 4.74 ± 2.56    | 3.77 ± 1.59   | 3.96 ± 1.52   | 3.87 ± 2.20       | 0.94 ± 2.93     | 4.34 ± 2.47     | 5.29 ± 3.46   |
| <b>LH (µU/ml)</b>           | 9.58 ± 6.27     | 8.57 ± 6.72    | 5.59 ± 1.76   | 6.68 ± 2.34   | 7.18 ± 4.70       | 2.36 ± 8.34     | 8.99 ± 5.46     | 7.45 ± 7.20   |
| <b>Progesterone (ng/ml)</b> | 1.25 ± 1.29     | 4.33 ± 5.25    | 0.40 ± 0.26   | 0.34 ± 0.23   | 0.30 ± 0.20       | 0.83 ± 0.81     | 5.15 ± 6.50     | 0.31 ± 0.16   |
| <b>SHBG (nmol/L)</b>        | 70.78 ± 29.03   | 71.93 ± 26.24  | 40.02 ± 23.44 | 39.41 ± 18.34 | 42.76 ± 20.46     | 68.06 ± 52.54   | 66.54 ± 36.87   | 36.60 ± 15.45 |
| <b>Testosterone (ng/ml)</b> | 0.39 ± 0.17     | 0.33 ± 0.13    | 5.36 ± 1.99   | 5.07 ± 1.25   | 5.20 ± 2.25       | 0.48 ± 0.69     | 0.43 ± 0.20     | 4.39 ± 2.11   |

Table 1: Demographics of all participants and divided into their subgroups. Age is given from the 1st measurement. Hormone levels for the pre-treatment assessment and cisgender participants are provided for comparison only and were not used in the statistical analyses.
